# Supplementary material
Source: publisher site journal article supplement (https://www.spandidos-publications.com/3584/downloadSupplementary)

Figure S1. Knockdown efficiency of two shRNAs targeting DDIT3. Reverse transcription-quantitative PCR verification of two shRNAs targeting DDIT3 in SW480 cells. Statistical analysis by one-way ANOVA and Dunnett's multiple comparisons test (n=3). \*\*\*P<0.001 vs. shRNA-NC. sh, short hairpin (RNA); NC, negative control; DDIT3, DNA damage inducible transcript 3.

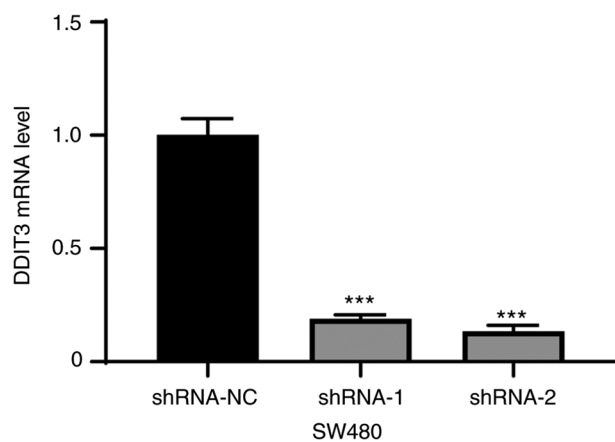

Supplement: Supplementary file 1 [file downloadSupplementary]
